# TopoDoE: A Design of Experiment strategy for selection and refinement in ensembles of executable Gene Regulatory Networks

Matteo Bouvier<sup>1, 2, 3</sup>, Souad Zreika<sup>1</sup>, Elodie Vallin<sup>1</sup>,  
Camille Fourneaux<sup>1</sup>, Sandrine Giraud-Gonin<sup>1</sup>,  
Arnaud Bonnaffoux<sup>2</sup>, Olivier Gandrillon<sup>3</sup>

<sup>1</sup>Univ Lyon, CNRS, ENS de Lyon, INSERM, UMR5239, U1210, LBMC,  
69364 Lyon, France.

<sup>2</sup>Vidium solutions, 46 Allée d'Italie, 69007 Lyon, France.

<sup>3</sup>Inria.

Contributing authors: [matteo.bouvier@ens-lyon.fr](mailto:matteo.bouvier@ens-lyon.fr);

## Abstract

**Background:** Inference of Gene Regulatory Networks (GRNs) is a difficult and long-standing question in Systems Biology. Numerous approaches have been proposed with the latest methods exploring the richness of single-cell data. One of the current difficulties lies in the fact that many methods of GRN inference do not result in one proposed GRN but in a collection of plausible networks that need to be further refined. In this work, we present a Design of Experiment strategy to use as a second stage after the inference process. It is specifically fitted for identifying the next most informative experiment to perform for deciding between multiple network topologies, in the case where proposed GRNs are executable models. This strategy first performs a topological analysis to reduce the number of perturbations that need to be tested, then predicts the outcome of the retained perturbations by simulation of the GRNs and finally compares predictions with novel experimental data.

**Results:** We apply this method to the results of our divide-and-conquer algorithm called WASABI, adapt its gene expression model to produce perturbations and compare our predictions with experimental results. We show that our networks were able to produce *in silico* predictions on the outcome of a gene

001  
002  
003  
004  
005  
006  
007  
008  
009  
010  
011  
012  
013  
014  
015  
016  
017  
018  
019  
020  
021  
022  
023  
024  
025  
026  
027  
028  
029  
030  
031  
032  
033  
034  
035  
036  
037  
038  
039  
040  
041  
042  
043  
044  
045  
046

047 knock-out, which were qualitatively validated for 48 out of 49 genes. Finally,  
048 we eliminate as many as two thirds of the candidate networks for which we  
049 could identify an incorrect topology, thus greatly improving the accuracy of our  
050 predictions.

051 **Conclusion:** These results both confirm the inference accuracy of WASABI and  
052 show how executable gene expression models can be leveraged to further refine  
053 the topology of inferred GRNs. We hope this strategy will help systems biologists  
054 further explore their data and encourage the development of more executable  
055 GRN models.

056 **Keywords:** Gene Regulatory Network inference, executable GRN, GRN simulation,  
057 GRN ensemble, Design of Experiment, Perturbation experiment

058

059

060

061

## 062 **Background**

063

064 For the last 60 years, it has been commonly admitted that a precise knowledge of  
065

066 gene regulatory interactions is required to fully understand the processes of cell

067

068 decision making (differentiation, proliferation or death) in response to a stimulus

069 [1, 2]. Therefore, for the last three decades, the Systems Biology field has dedicated

070

071 a great deal of effort to infer the structure of Gene Regulatory Networks (GRNs).

072

073 Initial attempts suffered from the imprecision of bulk RNA-seq, in which the expres-

074

075 sion data from millions of cells was averaged, masking cellular heterogeneity and

076

077 stochastic phenomena. Algorithms developed in the last ten years benefited from the

078

079 development of single-cell RNA-seq technologies, which now allows to access mRNA

080

081 distributions in more details and investigate causal dependencies between genes.

082

083 Indeed, the single-cell resolution was shown to contain a much richer information  
084 that the mean value alone [3–5].

084

085

086 However, the precise identification of biological parameters of a GRN and the

087

088 problem of distinguishing between multiple possible topologies remain to this day

089

090 challenging problems. Attempts at solving those problems were for example made

091

092 in the context of the DREAM challenges [6] where experimental design strategies

092

were developed. The general goal of those strategies was to decide under which  
perturbation (gene knock-out (KO), knock-down (KD) or over-expression), at which  
time point(s) and through which kind of data (bulk or single-cell RNA-seq, pro-  
teomics, ...) a process of interest should be observed to discard the largest amount  
of incorrect GRNs, therefore leading to a small number of most relevant GRNs (and  
ideally leaving only one). Those strategies must respond to the difficult question of  
maximizing the amount of newly acquired data while minimizing the costs (financial  
costs, time required), dealing with measurement uncertainties and accounting for the  
stochastic nature of gene expression.

Recently our team developed WASABI [7], a tool which allows to 1) infer GRNs  
from time-stamped scRNA-seq data and 2) simulate those GRNs. Simulations are  
made possible by a mechanistic model of gene expression, previously described in [8],  
where a stochastic process controls promoter activation and a set of ODEs determines  
RNA and protein synthesis, resulting in a Piecewise Deterministic Markov Process  
(PDMP). The algorithm works by iteratively building and simulating ensembles of  
candidate GRNs from which the best performing are selected.

This GRN inference algorithm was applied to a dataset of single-cell RTqPCR data  
obtained on differentiating chicken erythrocytic cells. As expected, it did not produce  
a single GRN but rather a collection of 364 candidate GRNs equally well suited for  
reproducing experimental data when simulated. It is therefore the ideal playground  
for the development of a Design of Experiment strategy able to efficiently reduce the  
number of candidate GRNs previously generated by a GRN inference algorithm.

To do this, we introduce TopoDoE, an iterative method for the *in silico* identifi-  
cation of the most informative perturbation – that is eliminating as many incorrect

139 candidate GRNs as possible from the data gathered in one experiment. That method  
140 is a 4 step process in which :

- 141
- 142
- 143 1. a topological analysis is performed on the set of candidate GRNs to identify the  
144 most promising gene targets. This is essential to avoid the heavily time-consuming  
145 simulation of all possible gene perturbations.  
146
- 147 2. *in silico* perturbation and simulation of the identified gene targets and ranking of  
148 those perturbations to identify the most informative one.  
149
- 150 3. *in vitro* execution of the selected perturbation and scRNA-seq data acquisition.  
151
- 152 4. selection of the subset of candidate GRNs which accurately predicted the novel  
153 experimental data.  
154
- 155

156 This strategy led to the identification of the *FNIP1* gene as a promising target,  
157 that was knocked-out in chicken erythrocytic progenitor cells. The *in silico* predictions  
158 of *FNIP1* KO were verified for 48 out of 49 genes in our GRNs. The DoE strategy  
159 helped reduce the 364 candidates into 133 most relevant ones. The merging of those  
160 133 GRNs led to one GRN with a much improved goodness of fit to experimental data  
161 than any other candidate.  
162

163  
164  
165  
166  
167

## 168 Results

169  
170

### 171 Initial setting

172

173 WASABI has previously been applied to the inference of the GRN governing the  
174 differentiation process of avian erythrocyte progenitor cells (T2ECs) into mature  
175 erythrocytes [7]. It generated 364 candidate GRNs, all made of the same 49 genes  
176 ([S1 Table](#)) and of a unique stimulus mimicking the change of culture medium which  
177 triggers the differentiation process [9]. As shown in [S1 Fig](#), all 364 GRNs shared an  
178 overall close but always different topology. When comparing all GRNs two-by-two,  
179 we found on average a low number of different interaction values between pairs of  
180  
181  
182  
183  
184

genes: only 7.72 different values out of the 160 total existing interactions. Fig 1.A shows the graph of interactions of one such candidate GRN.

GRNs generated by WASABI were defined by a mechanistic model of gene expression based on coupled Piecewise-Deterministic Markov Processes (PDMPs) governing how the mRNA and Protein quantities change over time. In this model, the gene promoter activation (i.e. gene bursting frequency) is function of the expression level of all other genes. Gene  $A$  is said to regulate gene  $B$  when the interaction value  $\theta_{A,B}$  is not null.

Because this model was executable, it allowed us to simulate the behavior of GRNs over some period of time by solving the underlying PDMPs. The result of a GRN simulation was a collection of matrices of cells  $\times$  genes values of mRNA counts, one for each time point. When simulated, all 364 candidate GRNs produced similar count matrices: distances between simulated and experimental data were indeed all close (see S2 Fig), with distance variations explained purely by the randomness of the simulations and no GRN performing significantly better than others. Here, distances were computed using the Kantorovich distance [10] taken on marginals (i.e. computed one gene at a time). Our next objective was thus to identify a perturbation which would produce different GRN responses in the form of diverse count matrices.

### Step 1: Topological analysis

Depending on the number of genes in the GRNs of interest, simulation of all possible perturbations on all genes might be very time consuming or even completely unfeasible. We thus sought to develop a preliminary step to our strategy, based on the topological analysis on the set of candidate GRNs, that would allow us to identify

231  
232  
233  
234  
235  
236  
237  
238  
239  
240  
241  
242  
243  
244  
245  
246  
247  
248  
249  
250  
251  
252  
253  
254  
255  
256  
257  
258  
259  
260  
261  
262  
263  
264  
265  
266  
267  
268  
269  
270  
271  
272  
273  
274  
275  
276

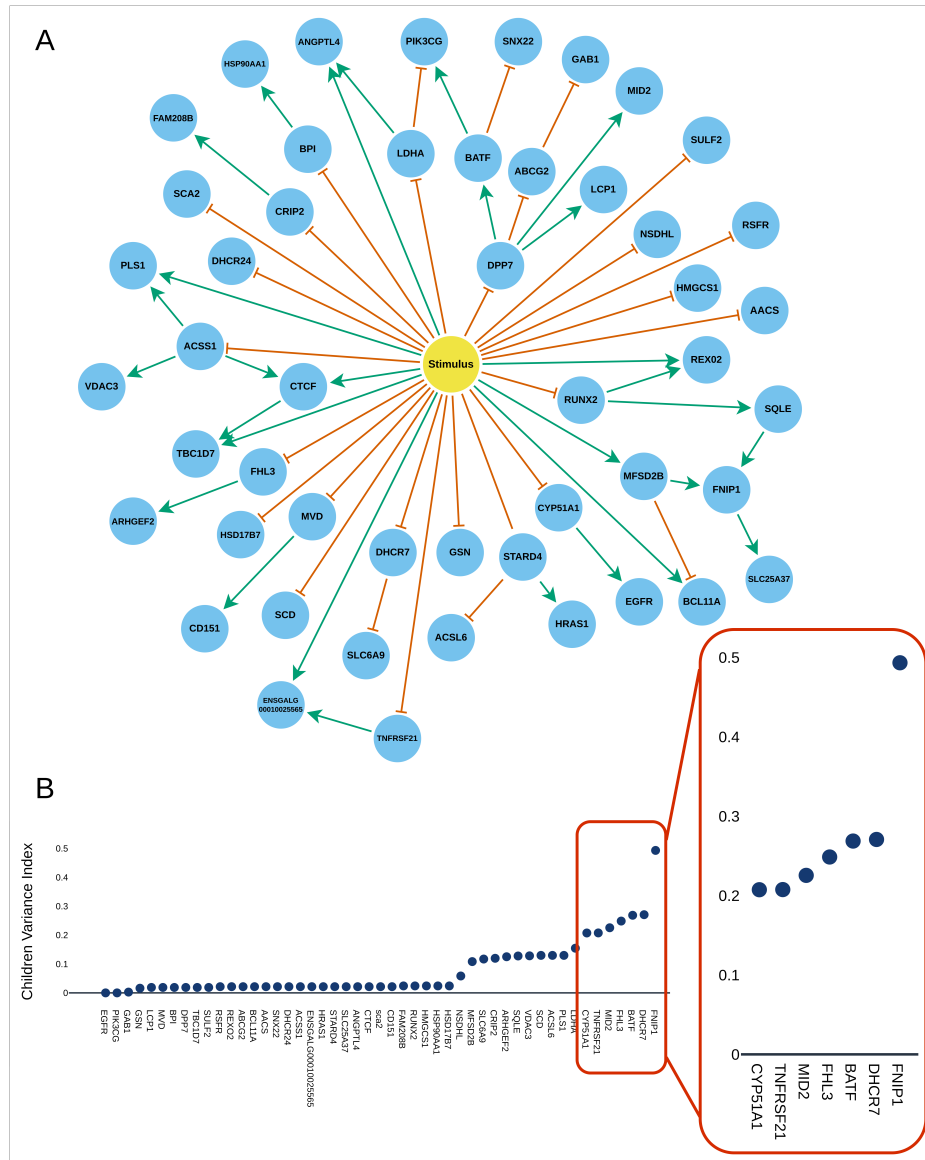

**Fig. 1 Topological features of the 364 candidate GRNs inferred by WASABI. A** Graph of one of the 364 candidate GRNs. Genes are shown as blue nodes and the stimulus as a yellow node. Green edges represent positive regulations ( $\theta > 0$ ) from a gene source to a gene target while orange edges represent negative regulations ( $\theta < 0$ ). **B** Descendants Variance Index (DVI) per gene. This index gives the variance of interactions between a gene and the genes it regulates, found in all 364 GRNs. A high value indicates that a gene has highly varying interactions among all of the candidate GRNs.

genes having the highest chance of producing informative perturbations. This analysis

was motivated by the fact that, while some gene-to-gene (or stimulus-to-gene) interactions appeared in all GRNs, others were present in very few of them (for example, the regulation of *FNIP1* by *GAB1* only appears in one of the 364 candidates; see **S3 Fig**). In particular, the gene *FNIP1* had many possible regulator genes : interactions with 47 out of the 49 genes could be found in the set of candidates, but only in at most 9 GRNs at a time (except for the regulation by *MFSD2B* which was found in all GRNs). This configuration is intuitively promising since the GRNs would produce many different regulatory dynamics upon perturbation of a single target gene, because of their many distinct gene-to-gene interactions.

To identify the genes with the most variable interactions with its descendants (the downstream genes it regulates), we proposed the **Descendants Variance Index (DVI)**. Briefly, this index considers one gene at a time and measures how much interactions between that gene and its descendants **qualitatively** change in the whole set of candidate GRNs (change from activation to inhibition or to no interaction at all). High values for a gene on the DVI indicate that many different types of regulations can be found in the GRNs while low values show that most GRNs have the same regulations. Here, we focused only on downstream genes since we will only consider KO experiments in later steps, thus only affecting the expression of genes regulated by the KO target, as it is the case for most kinds of perturbations.

DVI values were highest for genes *FNIP1* (DVI=0.4934), *DHCR7* (DVI=0.2707), *BATF* (DVI=0.2687), *FHL3* (DVI=0.2487) and *MID2* (DVI=0.2255), as shown in Fig 1.B. Those 5 genes were thus selected for studying the effect of their *in silico* perturbation.

## 323 **Step 2: *In silico* perturbations**

324

325 We simulated the 364 candidate GRNs after KO of each of the genes identified in the  
326 previous analysis. Simulated data had to be compared to reference unperturbed data  
327 to obtain predictions on which genes would display significant expression variations  
328 upon perturbation. Finally, a measure of entropy was used to select the most infor-  
329 mative perturbation. Finally, a measure of entropy was used to select the most infor-  
330 mative perturbation. Finally, a measure of entropy was used to select the most infor-  
331 mative perturbation. Finally, a measure of entropy was used to select the most infor-  
332 mative perturbation.

333

334

335 Before any simulation could be run however, constant hyper-parameters of our  
336 model needed to be chosen so as to obtain balanced simulations. The goal here was  
337 to set the initial state of the simulations so that they would reproduce experimental  
338 data from unperturbed cells in a stable way in the absence of any perturbation. This  
339 was an essential preliminary step for correct interpretation of the results since incor-  
340 rect simulation balancing would introduce simulation biases, either spontaneously  
341 drifting away from the initial state or remaining stuck on it and thus masking the  
342 effect of a perturbation. We devised an initialisation method based on a modified  
343 simulated annealing algorithm which simulated gene expression values for 40 hours  
344 with different hyper-parameters' values to identify optimal combinations.  
345 with different hyper-parameters' values to identify optimal combinations.  
346 with different hyper-parameters' values to identify optimal combinations.  
347 with different hyper-parameters' values to identify optimal combinations.  
348 with different hyper-parameters' values to identify optimal combinations.  
349 with different hyper-parameters' values to identify optimal combinations.  
350 with different hyper-parameters' values to identify optimal combinations.

351

352

353 Then, *in-silico* data was obtained for all 6 conditions (reference data with no  
354 perturbation and each of the 5 selected genes knocked-out independently). For each,  
355 all 364 candidate GRNs were simulated for 100 hours, so that they had enough time  
356 to reach a new stable state after perturbation. Data was recorded at the end of the  
357 100 hours to obtain mRNA count matrices of 200 cells each.  
358 to reach a new stable state after perturbation. Data was recorded at the end of the  
359 to reach a new stable state after perturbation. Data was recorded at the end of the  
360 to reach a new stable state after perturbation. Data was recorded at the end of the  
361 to reach a new stable state after perturbation. Data was recorded at the end of the

362

363

364 Counts of mRNA molecules after each perturbation were compared to the refer-  
365 ence dataset using one-sided t-tests for both 'greater' and 'less' mean value hypothesis.  
366 The effects on downstream genes are shown in Table 1, where the number of GRNs  
367 The effects on downstream genes are shown in Table 1, where the number of GRNs  
368 The effects on downstream genes are shown in Table 1, where the number of GRNs

368



| Knock-Out target | Gene               | Effect          | GRNs (with interaction) |     |
|------------------|--------------------|-----------------|-------------------------|-----|
| FNIP1            | SNX22              | down-regulation | 88 (88)                 | 369 |
|                  | SLC25A37           | down-regulation | 45 (45)                 | 370 |
|                  | ENSGALG00010025565 | up-regulation   | 102 (102)               | 371 |
| DHCR7            | FNIP1              | down-regulation | 6 (8)                   | 372 |
|                  | SLC6A9             | up-regulation   | 1 (192)                 | 373 |
| BATF             | FNIP1              | down-regulation | 7 (7)                   | 374 |
|                  | PIK3CG             | down-regulation | 364* (364)              | 375 |
|                  | SNX22              | up-regulation   | 178 (178)               | 376 |
| FHL3             | ARHGEF2            | down-regulation | 364* (364)              | 377 |
|                  | FNIP1              | down-regulation | 8 (8)                   | 378 |
|                  | SLC6A9             | ∅               | 0* (127)                | 379 |
| MID2             | FNIP1              | down-regulation | 7 (8)                   | 380 |
|                  | SLC6A9             | ∅               | 0* (45)                 | 381 |
|                  | ENSGALG00010025565 | down-regulation | 39 (39)                 | 382 |

**Table 1 Effects of *in-silico* perturbations.** The effects of single gene KO's on downstream genes were tested using one-sided t-tests for 'less' expression in the KO condition (**down-expression** in the 'Effect' column, p-value < 0.01) and for 'greater' expression in the KO condition (**up-expression** in the 'Effect' column, p-value < 0.01). The number of GRNs in which the gene showed an expression level variation is stored in the column 'GRNs'. Values in parenthesis indicate the number of GRNs which had a non-null interaction between the knocked-out gene and the downstream gene, which is the maximum expected number of GRNs showing an expression level variation. Asterisks indicate uninformative expression variations on downstream genes.

for which we measured significant expression variation is reported (p-value < 0.01). Rows colored in red indicate uninformative effects of a KO. Indeed, when the effect of a perturbation was the same in all of the 364 candidate GRNs or when no GRN responded to that perturbation, it provided no valuable information to discriminate GRNs. To assess the total amount of information given by a KO experiment, we measured for each gene the entropy on the proportions of GRNs with variations in expression levels. Measured entropy values are given in Table 2. The KO of *FNIP1* had the largest entropy (i.e. carried the most information) with a value of 1.0466. This perturbation was thus selected for the next steps.

415  
416  
417  
418  
419  
420  
421  
422  
423  
424  
425  
426  
427  
428  
429  
430  
431  
432  
433  
434  
435  
436  
437  
438  
439  
440  
441  
442  
443  
444  
445  
446  
447  
448  
449  
450  
451  
452  
453  
454  
455  
456  
457  
458  
459  
460

|         | <i>FNIP1</i> | <i>BATF</i> | <i>MID2</i> | <i>DHCR7</i> | <i>FHL3</i> |
|---------|--------------|-------------|-------------|--------------|-------------|
| entropy | 1.0466       | 0.6933      | 0.4265      | 0.4101       | 0.1038      |

**Table 2 Measured values of entropy after single gene KO.**

## Predictions of gene expression variation

Since we had selected *FNIP1* as target for a KO experiment, we sought to obtain *in-silico* predictions of the expected gene expression variations. To that end, the mRNA counts from all GRNs simulated under *FNIP1*'s KO were pooled together and compared to the reference condition to produce average predictions. As shown in Fig 2 and as expected from the results in Table 1, genes *SNX22* and *SLC25A37* had overall decreased mRNA counts in the KO condition and *ENSGALG00010025565* had increased mRNA counts (one-sided t-tests with p-value < 0.01). Also as expected, none of the 45 other genes had a significant expression variation (see S4 Fig).

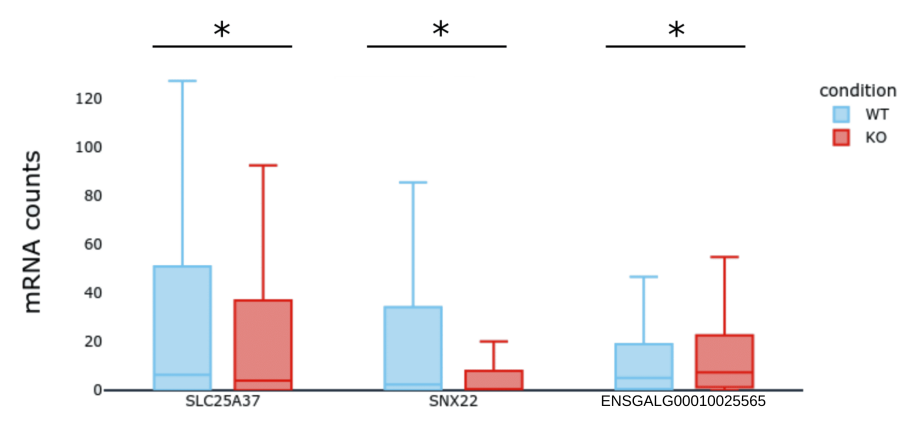

**Fig. 2 Simulations of FNIP1's Knock-Out.** Overall predictions on the gene expression levels after the *in silico* KO of FNIP1. Box plots summarize the mRNA counts obtained from the simulation of the 364 candidate GRNs in the Wild Type (WT, in blue) and in the knock-out (KO, in red) conditions, after 100 hours of simulation. Shown are the three genes with significant ( $p < 0.01$ ) expression variation.

### Step 3: *In vitro* perturbations

To test experimentally our *in-silico* predictions, we devised a dedicated strategy to obtain single cell transcriptomics data on cells that had been validated for the KO of *FNIP1* (Fig 3.A). One of the main challenges we had to face was that the T2ECs being primary cells, they have a finite lifetime of 30 days [9] during which the cells had to be transfected, cloned, amplified, molecularly validated, and seeded in 96 wells plate for subsequent scRTqPCR analysis.

Following *FNIP1*'s KO, we acquired single cell transcriptomics data for 61 KO cells and for 12 cells transfected with an empty plasmid which we used as control (Fig 3.B). We recovered expression data for 45 of the 49 genes in the GRNs. Genes *ABCG2*, *LDHA* and *GAB1* displayed poor quality data and were removed from the dataset.

Using one-sided t-tests, we found that the expression of genes *SNX22* and *SLC25A37* dropped significantly in the KO condition when compared to the control, which matched our predictions (see S2 Table and S5 Fig). Surprisingly however, the expression also dropped for genes *ENSGALG00010025565* and *SLC6A9*. This indicated a flaw in WASABI's inference method where it overestimated the basal expression level or the auto-activation strength for gene. For example, *ENSGALG00010025565*'s expression level was often supported by its own expression alone, as much as to not be regulated by any other gene in some candidate GRNs.

Importantly however, as previously predicted, no significant expression level variation was measured for the 45 other genes. Altogether, these results allowed us to confirm that WASABI was able to infer mostly correct GRNs with a remarkable accuracy. Indeed, the probability of making at most 2 errors on the qualitative responses

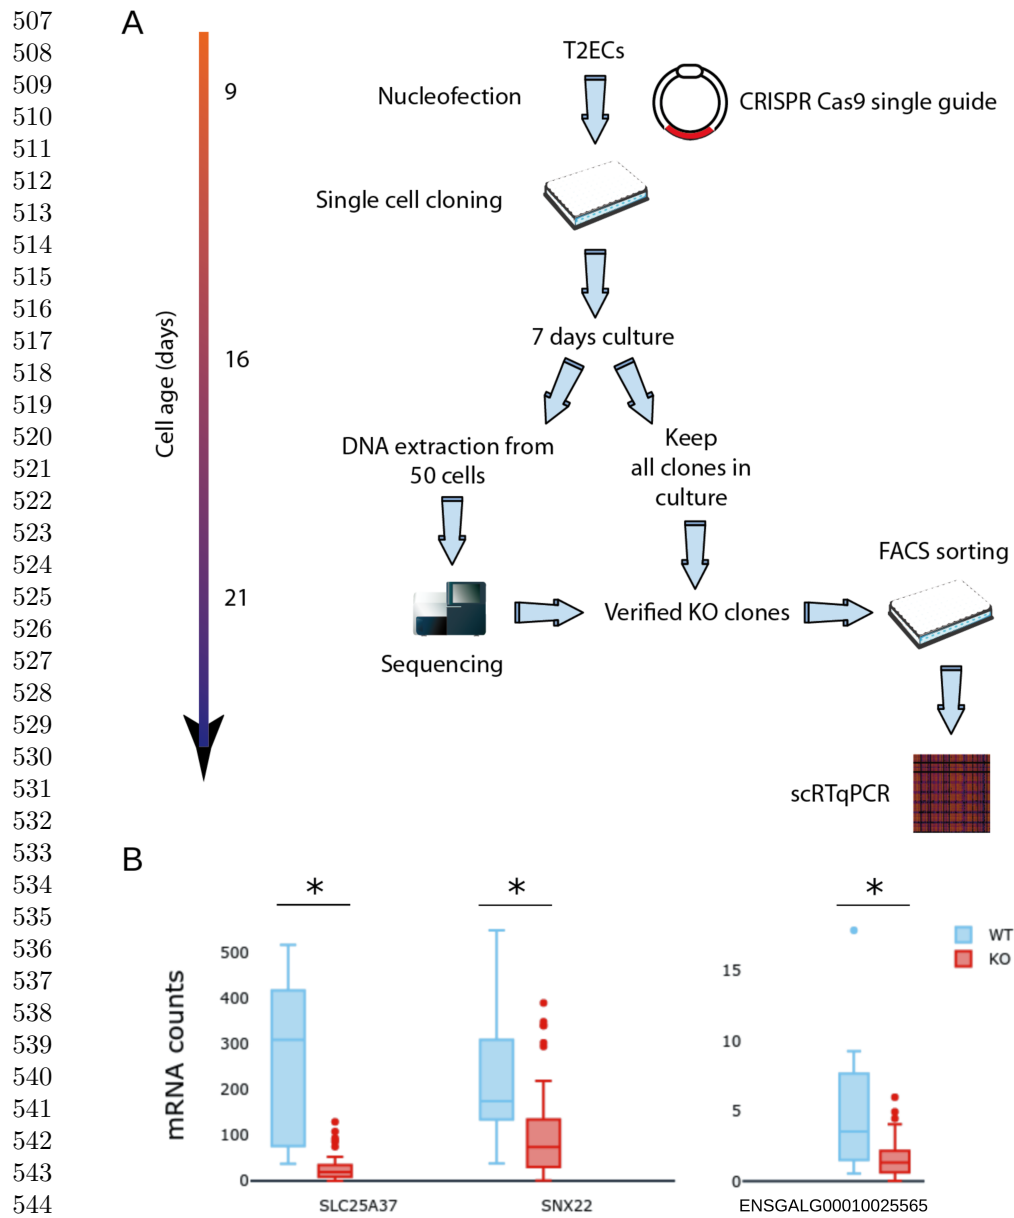

545 **Fig. 3** Generation and single-cell analysis of *FNIP1* KO cells. **A** The experimental strategy  
546 used for generating scRTqPCR data on validated *FNIP1* KO cells. **B** Single cell counts for wild type  
547 cells (in blue) and *FNIP1* Knock-Out cells (in red).

548  
549 of the 49 studied genes was only  $P(E \leq 2) = 2.0071 \cdot 10^{-20}$  with  $E$  the number of  
550 errors and with a probability of  $\frac{2}{3}$  of making an error for each gene.  
551  
552

**Step 4: GRN selection and refinement** 553  
554

From the previous step, we had identified a KO target, generated predictions on the 555  
gene expression variations after perturbation and verified most of our predictions 556  
from experimental KO data. The last step of our strategy was to rule out incorrect 557  
GRN candidates. From the novel information gathered in the experiment, we were 558  
also able to build a GRN more accurately reproducing the data. 559  
560  
561  
562  
563  
564

GRNs were selected by retaining only those with topologies coherent with the 565  
obtained experimental results. 45 GRNs with *FNIP1* positively regulating *SNX22* 566  
matched the decreased expression of *SNX22* and 88 GRNs with *FNIP1* positively 567  
regulating *SLC25A37* matched the expression drop of that gene. We decided to select 568  
those 133 GRNs among the 364 candidates and rule out the 231 others. 569  
570  
571  
572  
573  
574

Interestingly, no GRN had *FNIP1* regulating both *SNX22* and *SLC25A37* simul- 575  
taneously. This revealed a limitation in WASABI's exploration of possible GRN 576  
topologies which was caused by the limited computational resources available at the 577  
time WASABI was developed. This limitation prevented WASABI from exploring 578  
more complex topologies in which *FNIP1* regulated more than one gene at once. To 579  
overcome this limitation, the 133 selected GRNs were merged into a single GRN by 580  
computing the average of interaction values for each stimulus-to-gene or gene-to-gene 581  
regulation. 582  
583  
584  
585  
586  
587  
588  
589

To measure the performance of this new GRN, we computed the distance of 590  
simulated to experimental KO data for all 364 candidate GRNs. The distribution of 591  
such distances is shown as the blue histogram in Fig 4. Similarly, we computed the 592  
distance of simulated data obtained with the merged GRN to the experimental data 593  
(green dotted line). This distance was much lower than those obtained with any other 594  
595  
596  
597  
598

599 GRN, demonstrated the improved goodness of fit of the constructed GRN.

600

601

602

603

604

605

606

607

608

609

610

611

612

613

614

615

616

617

618

619

620

621

622

623

624

625

626

627

628

629

630

631

632

633

634

635

636

637

638

639

640

641

642

643

644

Finally, to verify the relevance of our selection, we merged all 364 candidate GRNs in the same way as before and again computed its distance to the experimental data (red dotted line in Fig 4). Again, we obtained a better performance than any of the 364 GRNs, which could be explained by the fact that, by merging all of the GRNs, we recovered the simultaneous regulation of *SNX22* and *SLC25A37* by *FNIP1*. However, that merged GRN did not perform as well as the one obtained by merging the 133 selected GRNs, confirming the relevance of our selection.

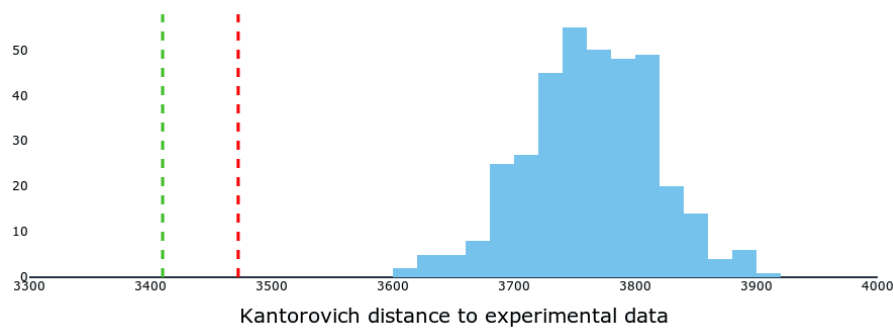

**Fig. 4 Simulations of *FNIP1*'s Knock-Out.** Evaluation of the GRNs' goodness of fit to experimental data. Kantorovich distances between experimental and simulated data were computed for the 364 candidate GRNs. The blue histogram shows the distribution of those distances. In red is the distance obtained from the simulation of the 364 GRNs merged into one. In green is the distance obtained after merging into one the 133 selected GRNs.

## Discussion

We have presented TopoDoE, a DoE strategy that was designed for selecting the most informative experiment to perform to significantly reduce the number of previously inferred GRNs. When applied as a follow-up step to WASABI's GRN inference algorithm, the presented strategy of network selection allowed to first identify and remove

incorrect GRN topologies and then to recover a new GRN better fitting experimental data than any other candidate.

## Validation of the inference algorithm

Initial simulations of GRNs inferred by WASABI showed they all fitted equally well the experimental data used in the inference step. This motivated the generation of new experimental data able to distinguish between the candidate networks. The simulation and then the experimental completion of *FNIP1*'s KO further showed that the 364 candidate GRNs proposed by WASABI closely matched the "true" GRN. Indeed, among the 49 studied genes, the expression level variation after *FNIP1*'s KO was incorrectly predicted for only 1 gene (*ENSGALG00010025565*). Most importantly, the sole up-regulations of *SNX22* and *SLC25A37* were anticipated, indicating that no other interactions with *FNIP1* as regulator were missed during the inference step. The probability of generating GRNs which would produce such accurate predictions purely by chance was extremely low. This finding provides us confidence on the quality of both WASABI's algorithm and the inferred GRNs.

## Identification of WASABI's limitations

One interesting finding was the ability of TopoDoE to also identify limitations in the GRN inference algorithm. A closer inspection of the candidate GRNs indeed revealed two main issues in the initial implementation of WASABI : (i) the exploration of possible GRN topologies was incomplete and (ii) selected topologies has a bias towards strong auto-activation regulations.

When WASABI was run on a super computer, it required one entire CPU node per tested topology for its simulation. Combined with the simulation slowness, this lead to high needs for computation resources which in turn meant that too few GRN topologies could be explored per iteration of the algorithm. WASABI thus could not

691 explore more complex alternatives in which *FNIP1* would regulate more than one gene  
692 at a time. This is a common issue in the general scope of Machine Learning in which  
693 **exploration** – testing different solutions – and **exploitation** – evaluating a particu-  
694 lar solution’s relevance – need to be correctly balanced (see for example [11] or [12]).  
695  
696  
697

698  
699 Also, WASABI allowed some genes to have high basal expression level supported  
700 by strong auto-activations. In some cases, genes such as *ENSGALG00010025565*  
701 were in fact only regulated in that way and were thus completely disconnected from  
702 the rest of the GRN. This evidently prevented the prediction of the positive regula-  
703 tion of *ENSGALG00010025565* by *FNIP1* as shown in the experimental data. This  
704 behavior can easily be corrected by adding a penalisation term to auto-activations in  
705 the future use of WASABI.  
706  
707  
708  
709

## 710 711 712 713 714 **Quality of the predictions**

715  
716 Even though *SNX22*’s and *SLC25A37*’s variation of expression levels after *FNIP1*’s  
717 KO were statistically significant in both simulation and experimental data, it must  
718 be noted that the predictions were only qualitatively accurate, but not quantitatively.  
719 Indeed, expression levels for both genes were very low in simulated data as compared  
720 with experimental data of *FNIP1* Knock-Out. This observation can be explained by  
721 the variability in mRNA counts between experiments. Indeed, mRNA counts did not  
722 always perfectly coincide between the training data (used to infer the GRNs) and the  
723 experimental data obtained after *FNIP1*’s KO. Also, the small number of cells in the  
724 experimental data (12 wild type and 61 knocked-out cells) could have induced a bias.  
725  
726  
727  
728  
729  
730

## 731 732 **GRN selection and refinement**

733  
734 In the final step of our strategy, we selected the candidate GRNs which qualitatively  
735 predicted the expression variation for at least one gene, after *FNIP1*’s KO. This  
736



resulted in a total of 133 selected GRNs, thus eliminating two thirds of the candidates. 737

Even though the “true GRN” was not in the initial set of candidates, it was possible 738  
to recover it at least partially by merging promising GRNs together. Here, when merg- 739  
ing the 133 selected candidates, we built a new GRN which performed significantly 740  
better than all other candidates in reproducing the reference data. 741  
742  
743  
744  
745  
746

## Expanding to other perturbations 747

In this work, we only worked with KO perturbations since we had mastered the 748  
CRISPR-cas9 system in T2ECs, which allowed to perturb all genes downstream of the 749  
target. However, TopoDoE could easily be expanded to other types of perturbations 750  
such as knock-downs (where short interfering RNA fragments inhibit the translation 751  
of specific mRNAs [13, 14]) or over-expressions (obtained by introducing a dedicated 752  
plasmid in a cell [13]). In some cases, these approaches would be easier to apply than 753  
full knock-outs or allow to perturb genes that cannot be knocked-out because they 754  
are essential for the cell’s viability. Knock-downs and over-expressions can also be 755  
easily introduced in our expression model by increasing by some factor the  $d_0$  and 756  
 $s_0$  parameters respectively. Here we would focus on  $d_0$  and  $s_0$  to stay close to the 757  
biological processes since knock-downs increase the rate of mRNA degradation while 758  
over-expressions increase the amount of mRNA molecules synthesized. 759  
760  
761  
762  
763  
764  
765  
766  
767  
768  
769

Interestingly, we found that the variability in interaction values among the candi- 770  
date GRNs was maximal not when considering interactions between FNIP1 and the 771  
genes it regulated, but when considering interactions with the genes that regulated 772  
FNIP1 (see **S6 Fig**). It is however difficult to devise a perturbation targeting at once 773  
all of the interactions between a gene and those upstream of it, thus producing the 774  
maximum amount of different GRN responses. 775  
776  
777  
778  
779  
780  
781  
782

783 One possibility might be to use a reversion experiment, in which the differentia-  
784 tion stimulus is interrupted early. Depending on the exact regulation dynamics, the  
785 expression level of *FNIP1* could change greatly. From previous work [15], we know  
786 that T2ECs definitely commit to the differentiation after a precise amount of time  
787 after stimulation, but remain able to fully revert to the progenitor state before that.  
788 The exact time at which the commitment happens heavily depends on the GRN's  
789 topology and would thus allow to discriminate between different candidate topologies.  
790

791

792

793

794

795

796

797

798

799

800

801

802

803

804

805

806

807

808

809

810

811

812

813

814

815

816

817

818

819

820

821

822

823

824

825

826

827

828

## Iterating the DoE strategy

Our strategy can be repeated iteratively to further decrease the number of candidates: the set of selected GRNs could now be used as input for the topological analysis step. With a sustained rate of GRN selection of 50 to 70%, about 5 cycles of our strategy would be needed to reduce the original set of 364 GRNs to only 10 candidates. This would dramatically improve our confidence on the topology of the true GRN and thus greatly improve the precision of our predictions.

Finally, one should note that this strategy is not restricted to WASABI-generated GRNs, but is applicable whenever an ensemble of executable models of GRNs can be obtained.

## Applicability

As discussed in this work, TopoDoE heavily relies on the simulation of sets of candidate GRNs. To apply it in other settings, it is thus necessary to have produced ensembles of executable GRN models. Although few such models currently exist, several executable models have been published in the last years. Many of such models come from the field of Boolean networks in which GRNs are executable by nature

[16, 17]. Additionally, some models use an internal model of reactions to simulate single cell data accurately [18] as it is done in WASABI.

Finally, ensemble inference algorithms are still very uncommon to our knowledge, with notable exceptions such as [19] and [20]. This shows that the inference of ensembles of executable GRNs is a very valuable characteristic of WASABI. Our DoE strategy still remains applicable by combining inference and simulation methods cited above and the growing interest for executable ensembles of GRNs makes us believe that more such algorithms will come in the next years.

## Conclusions

Inference of GRNs has been at the heart of the systems biology field for decades, with numerous algorithms having been proposed. Their success has however been only partial because of the extreme complexity of the problem. In recent years, important progress has been made by :

- exploiting the richness of single-cell transcriptomics data
- introducing executable models of gene expression
- inferring ensembles of GRN topologies at once

Our strategy was specifically designed for such settings, where the goal – after some GRN inference process has produced an ensemble of executable candidate GRNs – is to identify where information is lacking for a more precise identification of the true GRN topology.

TopoDoE is divided into 4 simple steps, each aimed at 1) reducing the complexity of identifying informative perturbations, 2) generating predictions on the effects of a perturbation and selecting the best perturbation, 3) collection of experimental data

875 after perturbation and finally 4) comparison with predictions for GRN selection.

876

877

878

879

880

881

882

883

884

885

886

887

888

889

890

891

892

893

894

895

896

897

898

899

900

901

902

903

904

905

906

907

908

909

910

911

912

913

914

915

916

917

918

919

920

In this work, we limited our demonstration to single gene knock-outs but our strategy can easily be expanded to any kind of perturbation that can be simulated with the leveraged gene expression model. This, together with its iterative nature, makes us believe that our strategy has the potential to be used by many biologists wishing to refine their knowledge on the GRN they are studying.

It is also important to note that our results confirmed the remarkable efficiency of WASABI. Average predictions from the full ensemble of candidate GRNs proved to be correct for 48 out of the 49 genes in the networks, after the gene knock-out. With corrections made to the identified limitations of the algorithm, this gives us great confidence in WASABI and TopoDoE's ability to build high quality GRNs, providing us with a tool for efficiently exploring and understanding complex cellular processes and diseases.

## Methods

### Average number of differences between GRNs

To measure the number of differences between candidate GRNs topologies, we considered GRNs as directed graphs where nodes were the genes and edges were the  $\theta$  interaction values. We computed for each pair of GRNs  $a$  and  $b$  the number  $d_{a,b}$  of different  $\theta$  values between all pairs of genes  $i$  and  $j$  :

$$d_{a,b} = \sum_{i=1}^G \sum_{j=1}^G \mathbb{1}_{\theta_{i,j}^a \neq \theta_{i,j}^b} \quad (1)$$

with

$$\iota(\theta) = \begin{cases} 1, & \text{if } \theta > 0 \\ -1, & \text{if } \theta < 0 \\ 0 & \text{otherwise} \end{cases} \quad (2)$$

where  $G$  is the number of genes in the GRNs and  $\theta_{i,j}^x$  is the interaction value between genes  $i$  and  $j$  in GRN  $x$ . All  $d_{a,b}$  values were finally averaged to obtain the mean number of pairwise differences.

## Mechanistic model of gene expression

Simulations were run using a mechanistic model of gene expression described in [8] and based on the two-state model. Briefly, a gene  $i$  is described by a promoter  $E_i$  which can be in states *on* or *off* and randomly switches between those states at rates  $k_{on,i}$  and  $k_{off,i}$  respectively. When the promoter is active (*on* state), mRNA molecules ( $M_i$ ) are synthesized at rate  $s_0, i$ . At any time, proteins ( $P_i$ ) are produced at rate  $s_1, i$  from mRNA molecules, mRNAs are degraded at rate  $d_0, i$  and proteins are degraded at rate  $d_1, i$ . The following equations summarize the model :

$$\begin{cases} E(t) : 0 \xrightarrow{k_{on}} 1, 1 \xrightarrow{k_{off}} 0 \\ M'(t) = s_0 E(t) - d_0 M(t) \\ P'(t) = s_1 M(t) - d_1 P(t) \end{cases} \quad (3)$$

Interactions between stimuli and genes in a GRN are encoded by interaction parameters  $\theta$  and by letting rates  $k_{on,i}$  and  $k_{off,i}$  be functions of protein  $P = (P_1, \dots, P_G)$  and stimuli  $Q = (Q_1, \dots, Q_S)$  levels as described in equation 4 (see Fig 5).

$$k_{on,i}(P, Q) = \frac{k_{on\_min,i} + k_{on\_max,i} \beta_{kon,i} \Phi_i(P, Q)}{1 + \beta_i \Phi_i(P, Q)} \quad (4)$$

967 with

968

969

970

971

972

973

974

975

976

977

978

979

980

981

982

983

984

985

986

987

988

989

990

991

992

993

994

995

996

997

998

999

1000

1001

1002

1003

1004

1005

1006

1007

1008

1009

1010

1011

1012

$$\Phi_i(P, Q) = \prod_{s=1}^S \frac{1 + e^{\theta_{Q,i,s} (\frac{Q_s}{H_{Q,s}})^\gamma}}{1 + (\frac{Q_s}{H_{Q,s}})^\gamma} \prod_{j=1}^G \frac{1 + e^{\theta_{P,i,j} (\frac{P_j}{H_{P,j}})^\gamma}}{1 + (\frac{P_j}{H_{P,j}})^\gamma} \quad (5)$$

In equation 5,  $H_{Q,s}$  and  $H_{P,j}$  are interaction thresholds for stimuli and proteins respectively. Similarly, the interaction function for the rate  $k_{off}$  is given by equation 4 when replacing occurrences of index  $kon$  by  $koff$ . Equation 5 is a modified version of those introduced in [8] and [7] to account for multiple stimuli and with the added stimulus threshold parameter  $H_{Q,s}$ . The Hill exponent parameter  $\gamma$  is set to 4 in all cases.

For each gene, parameters  $\beta_{kon,i}$  and  $\beta_{koff,i}$  modify the gene's basal expression level to account for the constant influence of genes outside of the modelled GRN.  $\beta$  values are estimated from experimental single-cell mRNA distributions but their correct identification is challenging and the algorithm used to that end is described in section [Simulation balancing](#).

## Knock-Out perturbation implementation

Gene KOs were implemented in the simulation model by setting all  $\theta$  interaction values between the perturbed gene and its neighbors to 0.  $\beta_{Kon}$  and  $\beta_{Koff}$  values were also set to 0 for that gene. During simulation, the probability of promoter activation (E being in state *on*) was forced to 0 so that the gene would not even be transcribed at the basal level.

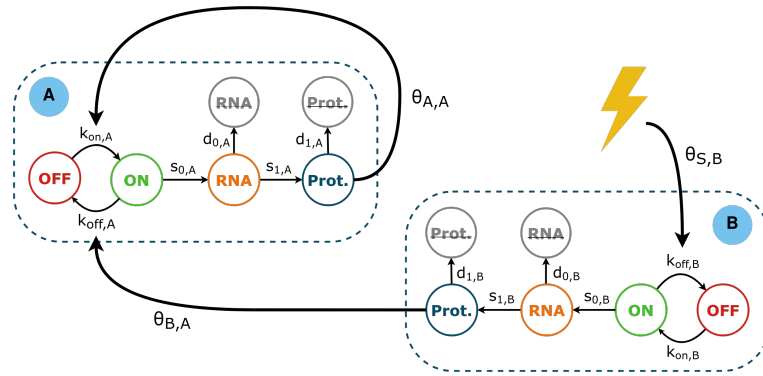

**Fig. 5 Executable GRN model.** An example of a model of 2 genes **A** and **B** with a stimulus **S** represented by a yellow thunderbolt. Gene **B** regulates genes **A**, shown here by a non-null  $\theta_{B,A}$  value, and is itself under the regulation of the stimulus. Gene **A** has an auto-activation loop :  $\theta_{A,A}$  defines a self regulation.

During balancing and simulation, reference mRNA and protein counts were systematically set to 0 for the knocked-out gene so that the simulation would start completely devoid of such molecules.

## Variance Indices

Per-gene variances in the gene-to-gene and stimulus-to-gene interactions in a set of GRNs (all sharing the same set of genes and stimuli) were computed using a variance index. First, all interaction values were categorized into activation (if the interaction value was greater than 0), inhibition (if the interaction value was lesser than 0) and no-interaction (if the interaction values was equal to 0). Those values were consequently replaced by 1, -1 and 0 respectively using the  $\iota(\theta)$  function defined in equation 2.

The Ancestors Variance Index (AVI) only considers interactions between a given gene and its parents (i.e. the genes regulating that given gene), while the Descendants Variance Index (DVI) only considers interactions with its children (i.e. genes regulated by that gene). Those two indices make it easy to identify if a gene's interactions vary mostly because of the interactions with genes upstream or downstream.

1013  
1014  
1015  
1016  
1017  
1018  
1019  
1020  
1021  
1022  
1023  
1024  
1025  
1026  
1027  
1028  
1029  
1030  
1031  
1032  
1033  
1034  
1035  
1036  
1037  
1038  
1039  
1040  
1041  
1042  
1043  
1044  
1045  
1046  
1047  
1048  
1049  
1050  
1051  
1052  
1053  
1054  
1055  
1056  
1057  
1058

1059 In particular, a gene KO is expected to have an effect on downstream genes.

1060

1061

1062 For each gene  $i$  in a collection of GRNs, the indices were defined as :

1063

1064

1065

1066

$$1067 \quad AVI_i = \sum_{g=1}^G Var(P_g) \quad (6)$$

1068

1069

1070

$$1071 \quad DVI_i = \sum_{g=1}^G Var(C_g) \quad (7)$$

1072

1073 where  $P_g$  is the vectors of interaction values between gene  $g$  and its parents and

1074

1075  $C_g$  the vector of interactions values with its children.  $G$  is the number of genes in the

1076

1077 GRNs.

1078

1079

## 1080 Measure of distance between multivariate distributions

1081

1082 Distances between multivariate distributions (simulated or experimental data) were

1083 measured using the Kantorovich distance [10] (also referred to as Wassertein or EMD

1084

1085 distance). Because of the high number of variables (i.e. genes), the number of sample

1086

1087 points (i.e. cells) was however too low to correctly estimate the multivariate Kan-

1088 torovich distance. We thus devised a modified distance which computes the sum of

1089

1090 Kantorovich distances on marginals (i.e. one variable at the time), making it practically

1091

1092 usable.

1093

1094 This distance, named  $Kantorovich_{1D}$ , has the following form :

1095

$$1096 \quad Kantorovich_{1D}(D^{(1)}, D^{(2)}) = \sum_{g=1}^G W_2(D_g^{(1)}, D_g^{(2)}) \quad (8)$$

1097

1098

1099 where  $D^{(1)}$  and  $D^{(2)}$  are 2 multivariate distributions (both with the same  $G$  vari-

1100

1101 ables) and  $W_2$  is the regular Kantorovich distance.  $D_g^{(1)}$  and  $D_g^{(2)}$  refer to the vector

1102

1103 of values in  $D^{(1)}$  and  $D^{(2)}$  for variable  $g$ .

1104



## Simulation balancing

Before any simulation could be executed, it was essential to correctly balance it, i.e. constant hyper-parameters had to be chosen such that the initial state produced by the simulation was a desired stable state. Here, parameters  $\beta_{Kon}$  and  $\beta_{Koff}$  act as adjustment variables which can force genes into high or low expression regimes by increasing or decreasing the value of the interaction function  $\phi$ .

Finding the correct  $\beta$  values is a non trivial task since 2 parameters ( $\beta_{Kon}$  and  $\beta_{Koff}$ ) need to be fitted for each gene of the  $G$  genes in the GRN. In our case,  $49 \times 2 = 98$  parameters needed to be fitted per GRN. Such high dimensional optimization problems suffer from the curse of dimensionality and either converge to a solution in very long times or don't allow a solution to be found at all.

Fortunately, each gene could be considered independent from the other since the goal of the balancing process was to find  $\beta$  values such that the expression level of all genes remained totally unchanged. In this case, all mRNA and protein distributions (apart from that of the gene we are trying to balance) can be considered constant through time, thus transforming a  $G \times 2$  dimensional optimization problem into  $G$  2 dimensional problems.

Resolution of these problems was however made difficult by the stochastic nature of the simulation outputs. To that end, we adapted a simulated annealing algorithm to the noisy cost function case as described in [21] and [22]. We designed a cost function taking as input a tuple of  $\beta_{Kon}$  and  $\beta_{Koff}$  values, which executes the simulation of a single gene with those  $\beta$  values for 20 hours and returns the Kantorovich distance between the simulated data (at t=20h) and the initial data (at t=0h). The simulated

1105  
1106  
1107  
1108  
1109  
1110  
1111  
1112  
1113  
1114  
1115  
1116  
1117  
1118  
1119  
1120  
1121  
1122  
1123  
1124  
1125  
1126  
1127  
1128  
1129  
1130  
1131  
1132  
1133  
1134  
1135  
1136  
1137  
1138  
1139  
1140  
1141  
1142  
1143  
1144  
1145  
1146  
1147  
1148  
1149  
1150

1151 annealing method is detailed in Additional file 1.

1152

1153

1154

1155

## 1156 **Simulation initialization**

1157

1158 After balancing, simulations were initialized by setting mRNA counts for each gene

1159 from the distribution of single-cell RT-qPCR data which was used in the GRN

1160

1161 inference task. Only data at the initial time point was used here.

1162

1163

## 1164 **Measure of information gained after perturbation**

1165

1166 Simulations of perturbations on the set of candidate GRNs predicted effects on vary-

1167

1168 ing numbers of genes and significant gene level variations were observed for different

1169

1170 proportions of the 364 GRNs. To determine which perturbation carried the most

1171

1172 information, we computed the entropy of the proportion of GRNs with significant

1173

1174 expression variation for each of the 49 genes. As an example, *FNIP1* had significant

1175

1176 expression variation for genes *SNX22* (in 88 out of the 364 GRNs), *SLC25A37* (in 45

1177

1178 GRNs) and *ENSGALG00010025565* (in 102 GRNs). We thus computed the entropy

1179

1180 using equation 9, where  $p$  was the vector  $(\frac{88}{364}, \frac{45}{364}, \frac{102}{364}, 0, \dots, 0)$  (with 46 trailing zeros

1181

1182 for the 46 genes with no significant variation) encoding the proportion of GRNs with

1183 expression variation.

1184

1185

1186

1187

## 1188 **Cell culture**

1189

1190 T2EC were extracted from 19-days-old SPAFAS white leghorn chicken's embryos' bone

1191

1192 marrow (INRA, Tours, France). These primary cells were maintained in self-renewal

1193

1194 in LM1 medium as previously described [9].

1195

1196

$$1184 \qquad \qquad \qquad - \sum p_k \times \log(p_k) \qquad \qquad \qquad (9)$$

## CRISPR plasmids construction 1197

A guide RNA against FNIP1's sequence (ENSGALG00000017462) was designed using 1198  
the CRISPOR design tool [23] to target the exon number 5. Oligonucleotides were 1199  
purchased from Eurogentec (Table 3). The guide was cloned after hU6 promoter into 1200  
BbsI-digested pCRISPR-P2A-tRNA vector [24]. The efficiency of our CRISPR vector 1201  
in T2EC cells was confirmed by analyzing mutations after sequencing. 1202  
1203  
1204  
1205  
1206  
1207

| Oligonucleotide   | Sequence                   | 1208 |
|-------------------|----------------------------|------|
| crFNIP1#9-Bbs1-S  | caccGCTTGGGTTCGAACTCCGGCAA | 1209 |
| crFNIP1#9-Bbs1-AS | aaacTTGCCGGAGTTCGACCCAAGC  | 1210 |
| FNIP1-S1          | TGGGGCATAAGCCATTCT         | 1211 |
| FNIP1-R3          | AAACTACAGACTCAAAGCTACAGA   | 1212 |

**Table 3 Oligonucleotides sequences used for CRISPR plasmid construction.** 1213

## Cells transfection 1214

After 12 days in culture,  $30 \times 10^5$  cells were resuspended in 100µL of transfection 1215  
medium (Cell Line Nucleofector Kit V – Amaxa) and transfected with 6,5µg of 1216  
pCRISPR-P2A-tRNA empty vector or pcrFNIP#9 vector using the T16 K652 pro- 1217  
gram. 500µL of RPMI (RPMI 1640 Medium no phenol red - Gibco) were added to the 1218  
cell solution for a recovery step of 8 min. Then cells were transferred at  $1,25 \cdot 10^6$  cell- 1219  
s/ml in LM1 medium without penicillin and streptomycin and grown in standard 1220  
culture conditions. 1221  
1222  
1223  
1224  
1225  
1226  
1227  
1228  
1229  
1230  
1231  
1232  
1233  
1234  
1235

## Single cells sorting 1236

24H after transfection, cells were harvested and resuspended in LM1 medium. Sorting 1237  
was performed at room temperature using BD FACS Aria 1 flow cytometer. Living 1238  
GFP-expressing cells were sorted in 96 wells U-shape culture plates containing 50µL 1239  
1240  
1241  
1242

1243 of regular LM1. Non-transfected cells were also sorted to be used as a negative control.  
1244  
1245 Plates were then placed back in incubator at 37°C, with 5% CO<sub>2</sub> (Fig 3).

1246

1247

### 1248 **Identification of *FNIP1* KO clones by sequencing**

1249

1250 30 clones were selected 7 days post-sorting and half of the culture was collected  
1251 for DNA/RNA extraction with Quick-DNA/RNA™ Microprep Plus Kit (Zymo)

1252

1253 according to the manufacturer's protocol. The amplified DNA fragments (with FNIP1-  
1254

1255

1256 S1/FNIP1-R3 primers (Table 3)) were cloned into the pCR™4-TOPO® TA vector  
1257 (TOPO™ TA Cloning™ Kit for Sequencing without competent cells - Invitrogen). We

1258 selected a clone presenting a frame shift leading to an early stop codon on both alleles  
1259

1260 for subsequent transcriptomics analysis.

1261

1262

### 1263 **Single-cell RT-qPCR analysis**

1264

1265 Individual cells from clones transfected with the pcrFNIP#9 vector (*FNIP1* KO cells)

1266

1267 or the empty vector clones (wild type cells) were sorted into 96-well plates using BD

1268 FACS Aria 1 flow cytometer. All the manipulations related to the high-throughput

1269

1270 scRT-qPCR experiments in microfluidics were performed according to the protocol

1271

1272 recommended by the Fluidigm company (PN 68000088 K1, p.157-172). All steps from

1273

1274 single-cell isolation, gene selection, data generation by scRT-qPCR are described in

1275

1276 details in [25].

1277

### 1278 **Declarations**

1279

1280

### 1281 **Ethics approval and consent to participate**

1282

1283 According to the directive 2010/63/eu of the European Parliament and of the Coun-

1284

1285 cil of 22 September 2010 on the protection of animals used for scientific purposes,

1286

1287 'procedure' excludes the killing of animals solely for the use of their organs or tissues.

1288

|                                                                                                                                    |      |
|------------------------------------------------------------------------------------------------------------------------------------|------|
| Since this is exactly what has been done in the present paper, since no procedure was                                              | 1289 |
| involved, no approval was required.                                                                                                | 1290 |
|                                                                                                                                    | 1291 |
|                                                                                                                                    | 1292 |
| <b>Consent for publication</b>                                                                                                     | 1293 |
|                                                                                                                                    | 1294 |
| Not applicable                                                                                                                     | 1295 |
|                                                                                                                                    | 1296 |
|                                                                                                                                    | 1297 |
|                                                                                                                                    | 1298 |
| <b>Availability of data and materials</b>                                                                                          | 1299 |
|                                                                                                                                    | 1300 |
| The datasets analysed during the current study are available in the OSF repository,                                                | 1301 |
| <a href="https://osf.io/r3ujs/">https://osf.io/r3ujs/</a> . Additionally, TopoDoE is made available as a Python library            | 1302 |
| which can be downloaded from github at <a href="https://github.com/Vidium/topodoe">https://github.com/Vidium/topodoe</a> . The     | 1303 |
| simulated annealing algorithm modified for noisy cost functions that we used for                                                   | 1304 |
| balancing our simulations is also available as a Python library. Source code can be                                                | 1305 |
| downloaded from github at <a href="https://github.com/Vidium/josiann">https://github.com/Vidium/josiann</a> . The library can also | 1306 |
| be installed with pip by running ‘pip install josiann‘.                                                                            | 1307 |
|                                                                                                                                    | 1308 |
|                                                                                                                                    | 1309 |
|                                                                                                                                    | 1310 |
|                                                                                                                                    | 1311 |
|                                                                                                                                    | 1312 |
|                                                                                                                                    | 1313 |
| <b>Competing interest</b>                                                                                                          | 1314 |
|                                                                                                                                    | 1315 |
| The results of this work will be exploited within the frame of the company Vidium                                                  | 1316 |
| Solutions. MB and AB are full time employees of Vidium Solutions.                                                                  | 1317 |
|                                                                                                                                    | 1318 |
|                                                                                                                                    | 1319 |
|                                                                                                                                    | 1320 |
| <b>Funding</b>                                                                                                                     | 1321 |
|                                                                                                                                    | 1322 |
| This work was supported by Vidium Solutions (MB and AB) and by Agence Nationale                                                    | 1323 |
| de la Recherche (Grant SinCity; ANR-17-CE12-0031 to OG). The funders had no role                                                   | 1324 |
| in study design, data collection and analysis, decision to publish, or preparation of the                                          | 1325 |
| manuscript.                                                                                                                        | 1326 |
|                                                                                                                                    | 1327 |
|                                                                                                                                    | 1328 |
|                                                                                                                                    | 1329 |
|                                                                                                                                    | 1330 |
|                                                                                                                                    | 1331 |
|                                                                                                                                    | 1332 |
|                                                                                                                                    | 1333 |
|                                                                                                                                    | 1334 |

## 1335 **Authors' contributions**

1336

1337 MB designed and developed TopoDoE and Josiann. SZ, EV, CF, OG and SG designed  
1338

1339 the experimental process and generated the data analyzed in this work. MB, AB and

1340

1341 OG drafted the manuscript. All authors read and approved the final manuscript.

1342

## 1343 **Acknowledgments**

1344

1345 We would like to thank all members of the SBDM, Dracula and Vidium teams for their  
1346

1347 valuable advice and fruitful discussions. We also thank Alice Hugues, Emma Risson  
1348

1349 and Kaushik Karambelkar for participating as interns to the very early phases of that

1350

1351 work. We thank the BioSyL Federation and the LabEx Ecofect (ANR-11-LABX-0048)

1352 of the University of Lyon for inspiring scientific events.

1353

1354

## 1355 **References**

1356

1357

1358 [1] Britten RJ, Davidson EH. Gene Regulation for Higher Cells: A Theory: New

1359

1360 facts regarding the organization of the genome provide clues to the nature of gene

1361

1362 regulation. *Science*. 1969;165(3891):349–357.

1363

1364 [2] Jacob F, Monod J. On the regulation of gene activity. In: Cold Spring Harbor

1365

1366 symposia on quantitative biology. vol. 26. Cold Spring Harbor Laboratory Press;

1367

1368 1961. p. 193–211.

1369

1370 [3] Mar JC. The rise of the distributions: why non-normality is important for under-

1371

1372 standing the transcriptome and beyond [Journal Article]. *Biophys Rev*. 2019;p.

1373

1374 89–94. <https://doi.org/10.1007/s12551-018-0494-4>.

1375

1376 [4] Munsky B, Neuert G, van Oudenaarden A. Using gene expression noise to

1377

1378 understand gene regulation [Journal Article]. *Science*. 2012;336(6078):183–7.

1379

1380 [https://doi.org/336/6078/183\[pil\]10.1126/science.1216379](https://doi.org/336/6078/183[pil]10.1126/science.1216379).

- [5] Nicolas D, Phillips NE, Naef F. What shapes eukaryotic transcriptional bursting? 1381  
[Journal Article]. Mol Biosyst. 2017;13(7):1280–1290. [https://doi.org/10.1039/](https://doi.org/10.1039/c7mb00154a) 1382  
[c7mb00154a](https://doi.org/10.1039/c7mb00154a). 1383  
1384  
1385  
1386
- [6] Meyer P, Cokelaer T, Chandran D, Kim KH, Loh PR, Tucker G, et al. Network 1387  
topology and parameter estimation: from experimental design methods to gene 1388  
regulatory network kinetics using a community based approach. BMC systems 1389  
biology. 2014;8(1):1–18. 1390  
1391  
1392  
1393
- [7] Bonnaïffoux A, Herbach U, Richard A, Guillemin A, Gonin-Giraud S, Gros PA, 1394  
et al. WASABI: a dynamic iterative framework for gene regulatory network 1395  
inference. BMC bioinformatics. 2019;20(1):1–19. 1396  
1397  
1398  
1399
- [8] Herbach U, Bonnaïffoux A, Espinasse T, Gandrillon O. Inferring gene regulatory 1400  
networks from single-cell data: a mechanistic approach. BMC systems biology. 1401  
2017;11(1):1–15. 1402  
1403  
1404  
1405
- [9] Gandrillon O, Schmidt U, Beug H, Samarut J. TGF- $\beta$  cooperates with TGF- 1406  
 $\alpha$  to induce the self-renewal of normal erythrocytic progenitors: evidence for an 1407  
autocrine mechanism. The EMBO journal. 1999;18(10):2764–2781. 1408  
1409  
1410  
1411
- [10] Vershik AM. Kantorovich metric: initial history and little-known applications 1412  
[Journal Article]. Journal of Mathematical Sciences. 2006;133(4):1410–1417. 1413  
1414  
1415
- [11] Sutton RS, Barto AG. Reinforcement learning: An introduction. MIT press; 2018. 1416  
1417  
1418
- [12] Nguyen H, La H. Review of deep reinforcement learning for robot manipulation. 1419  
In: 2019 Third IEEE International Conference on Robotic Computing (IRC). 1420  
IEEE; 2019. p. 590–595. 1421  
1422  
1423  
1424  
1425  
1426

- 1427 [13] Bresson C, Gandrillon O, Gonin-Giraud S. sca2: a new gene involved in the self-  
1428 renewal of erythroid progenitors [Journal Article]. *Cell Proliferation*. 2008;41:726  
1429 – 738.  
1430  
1431  
1432  
1433 [14] Mejia-Pous C, Damiola F, Gandrillon O. Cholesterol synthesis-related enzyme  
1434 oxidosqualene cyclase is required to maintain self-renewal in primary erythroid  
1435 progenitors [Journal Article]. *Cell Prolif*. 2011;44(5):441–52. [https://doi.org/10.](https://doi.org/10.1111/j.1365-2184.2011.00771.x)  
1436 [1111/j.1365-2184.2011.00771.x](https://doi.org/10.1111/j.1365-2184.2011.00771.x).  
1437  
1438  
1439  
1440 [15] Zreika S, Fourneaux C, Vallin E, Modolo L, Seraphin R, Moussy A, et al.  
1441 Evidence for close molecular proximity between reverting and undifferentiated  
1442 cells [Journal Article]. *BMC Biology*. 2022;20(1):155. [https://doi.org/10.1186/](https://doi.org/10.1186/s12915-022-01363-7)  
1443 [s12915-022-01363-7](https://doi.org/10.1186/s12915-022-01363-7).  
1444  
1445  
1446  
1447  
1448 [16] Xu H, Ang YS, Sevilla A, Lemischka IR, Ma'ayan A. Construction and validation  
1449 of a regulatory network for pluripotency and self-renewal of mouse embryonic  
1450 stem cells. *PLoS computational biology*. 2014;10(8):e1003777.  
1451  
1452  
1453  
1454 [17] Woodhouse S, Piterman N, Wintersteiger CM, Göttgens B, Fisher J. SCNS: a  
1455 graphical tool for reconstructing executable regulatory networks from single-cell  
1456 genomic data. *BMC systems biology*. 2018;12:1–7.  
1457  
1458  
1459 [18] Cannoodt R, Saelens W, Deconinck L, Saeys Y. dyngen: a multi-modal simulator  
1460 for spearheading new single-cell omics analyses. *BioRxiv*. 2020;p. 2020–02.  
1461  
1462  
1463 [19] Ud-Dean SM, Gunawan R. Ensemble inference and inferability of gene regulatory  
1464 networks. *PloS one*. 2014;9(8):e103812.  
1465  
1466  
1467 [20] Aluru M, Shrivastava H, Chockalingam SP, Shivakumar S, Aluru S. EnGRaiN: a  
1468 supervised ensemble learning method for recovery of large-scale gene regulatory  
1469 networks. *Bioinformatics*. 2022;38(5):1312–1319.  
1470  
1471  
1472



- [21] Gutjahr WJ, Pflug GC. Simulated annealing for noisy cost functions. *Journal of global optimization*. 1996;8(1):1–13. 1473  
1474  
1475  
1476
- [22] Tóth J, Tomán H, Hajdu A. Efficient sampling-based energy function evaluation for ensemble optimization using simulated annealing. *Pattern Recognition*. 2020;107:107510. 1477  
1478  
1479  
1480  
1481  
1482
- [23] Concordet JP, Haeussler M. CRISPOR: intuitive guide selection for CRISPR/Cas9 genome editing experiments and screens. *Nucleic acids research*. 2018;46(W1):W242–W245. 1483  
1484  
1485  
1486  
1487  
1488
- [24] Richard A, Vallin E, Romestaing C, Roussel D, Gandrillon O, Gonin-Giraud S. Erythroid differentiation displays a peak of energy consumption concomitant with glycolytic metabolism rearrangements. *PLoS One*. 2019;14(9):e0221472. 1489  
1490  
1491  
1492  
1493  
1494
- [25] Richard A, Boullu L, Herbach U, Bonnafoux A, Morin V, Vallin E, et al. Single-cell-based analysis highlights a surge in cell-to-cell molecular variability preceding irreversible commitment in a differentiation process. *PLoS biology*. 2016;14(12):e1002585. 1495  
1496  
1497  
1498  
1499  
1500  
1501  
1502

## Supplementary Information 1503

### Additional\_file\_1.pdf 1504

Title: Supplementary methods. Description: A description of Josiann, a noisy simulated annealing algorithm implementation in Python. 1505  
1506  
1507  
1508  
1509  
1510

### Additional\_file\_2.pdf 1511

Title: Supplementary material. Description: supplementary figures and tables. 1512  
1513  
1514  
1515  
1516  
1517  
1518
